# Supplementary material for: A deep learning-based radiomics approach to predict head and neck tumor regression for adaptive radiotherapy
Source: PubMed Central journal article supplement (PMC9142601; doi:10.1038/s41598-022-12170-z), 2022-05-27
Supplement: 41598_2022_12170_MOESM1_ESM.pdf [file 41598_2022_12170_MOESM1_ESM.pdf]

# Supplementary information

## **A deep learning-based radiomics approach to predict head and neck tumor regression for adaptive radiotherapy**

Shohei Tanaka, M.S.,<sup>(1)</sup> Noriyuki Kadoya\*, Ph.D.,<sup>(1)</sup> Yuto Sugai, B.S.,<sup>(1)</sup>

Mariko Umeda, B.S.,<sup>(1)</sup> Miyu Ishizawa, B.S.,<sup>(2)</sup> Yoshiyuki Katsuta, Ph.D.,<sup>(1)</sup> Kengo Ito, M.S.,<sup>(1)</sup> Ken Takeda,  
M.D., Ph.D.,<sup>(2)</sup> Keiichi Jingu, M.D., Ph.D.,<sup>(1)</sup>

(1) Department of Radiation Oncology, Tohoku University Graduate School of Medicine, Sendai, Japan

(2) Department of Radiological Technology, School of Health Sciences, Faculty of Medicine, Tohoku  
University, Sendai, Japan

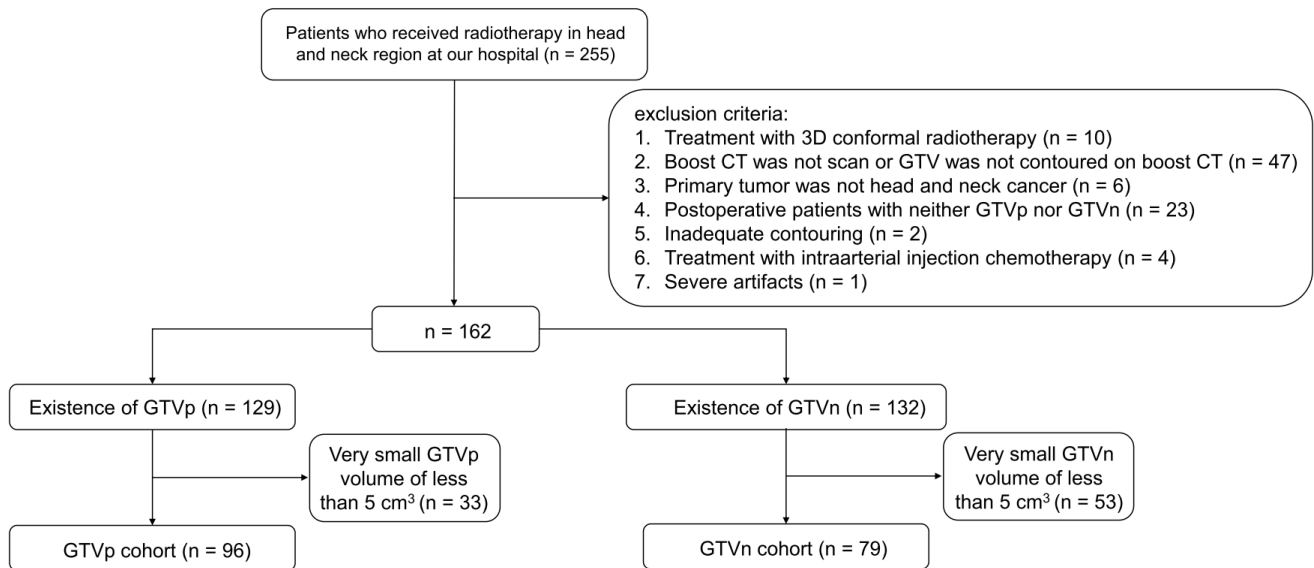

Supplementary Figure S1: **Inclusion and exclusion criteria for study enrolment.** GTVp: primary gross tumor volume; GTVn: nodal gross tumor volume

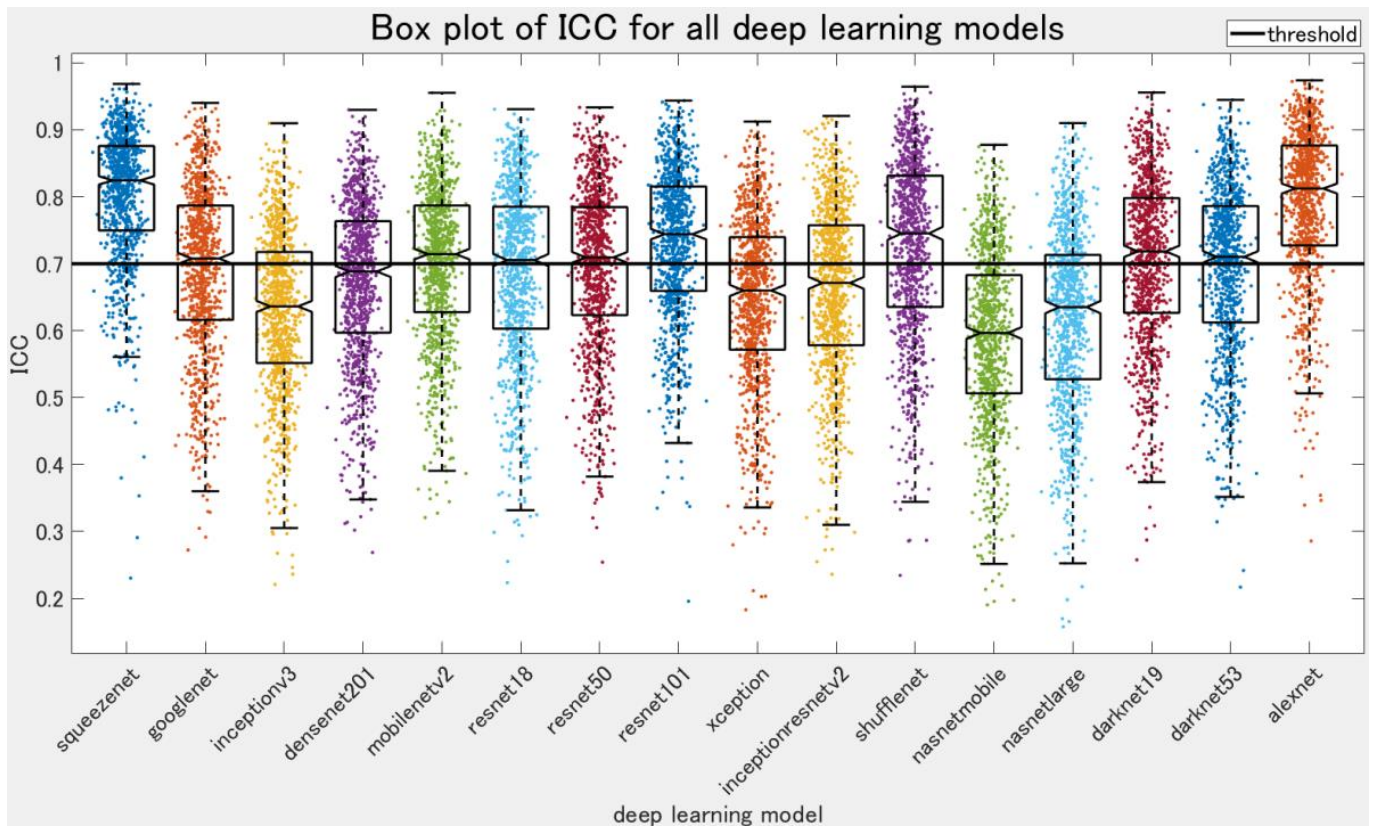

Supplementary Figure S2: **Intraclass correlation coefficients (ICCs) for features extracted by the 16 convolution neural network (CNN) deep learning models.** The x-axis identifies the deep learning model and the y-axis is the ICC. Deep features were extracted from a multiple segmentation dataset<sup>1</sup> by each deep learning model, and evaluated for robustness. Deep features with  $ICC > 0.7$  were regarded as robust.

a

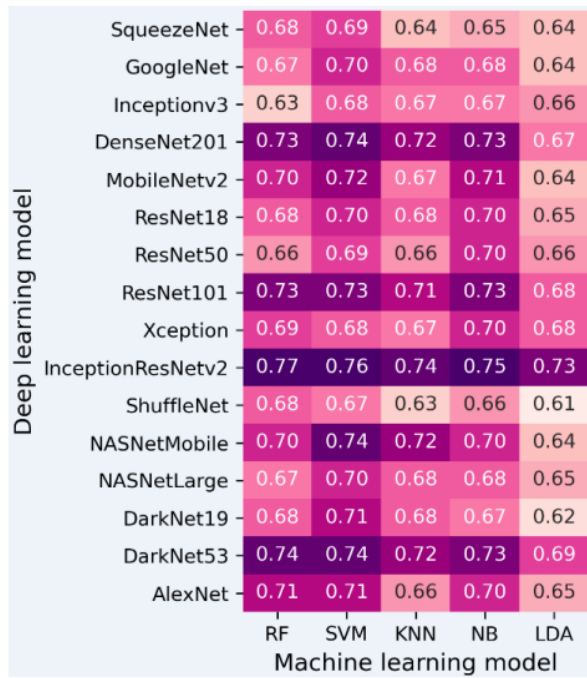

b

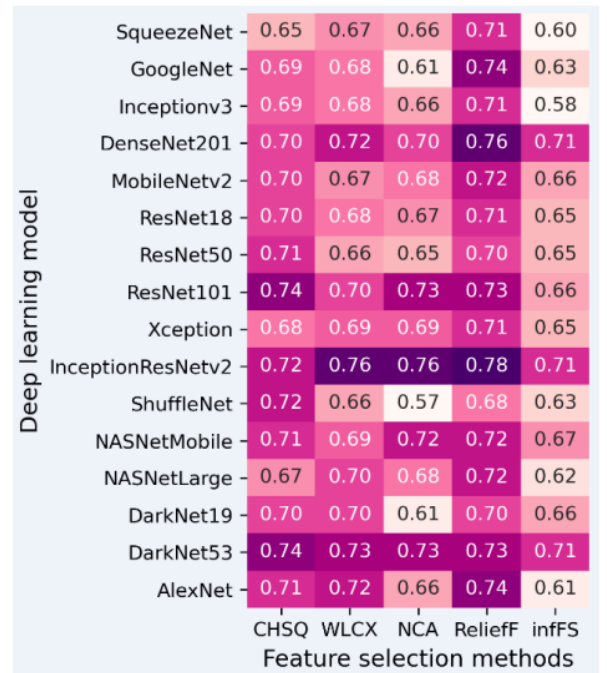

Supplementary Figure S3: **Areas under the curve (AUCs) for GTVp regression prediction yielded by all 16 deep learning models using each of the five machine learning algorithms and the five feature selection algorithms.** (a) Heatmap of AUCs yielded by the indicated deep learning model (row) using the indicated machine learning algorithm (column) and all five feature selection algorithms (i.e., each AUC is the average of five feature selection algorithms). (b) Heatmap of mean AUCs yielded by each deep learning model (row) and the indicated feature selection algorithm (column) for all five machine learning algorithms (i.e., each AUC is the average of five machine learning algorithms).

a

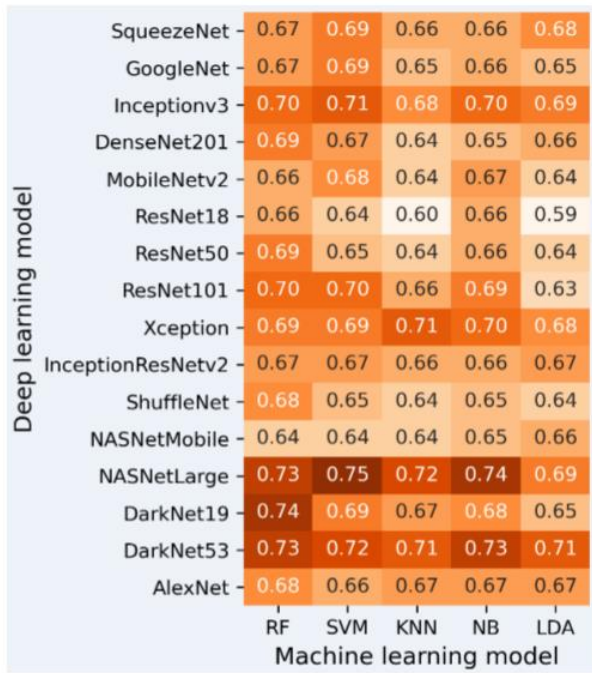

b

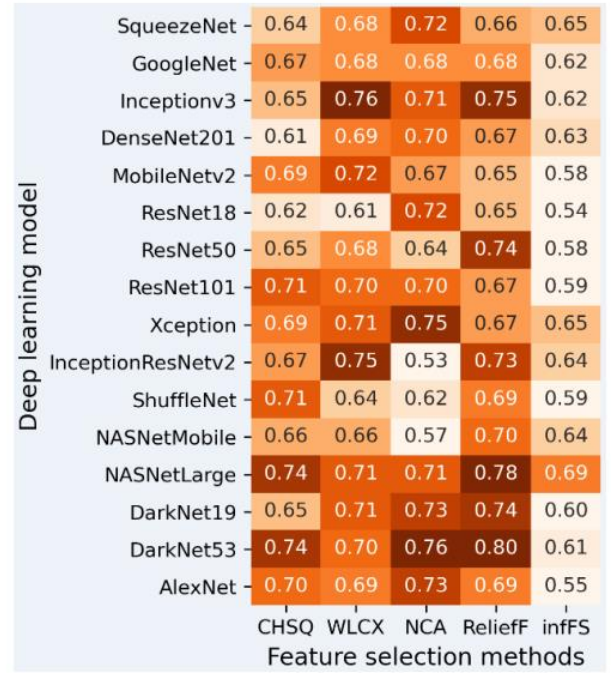

Supplementary Figure S4: **Areas under the curve (AUCs) for GTVn prediction yielded by all 16 deep learning models using each of the five machine learning algorithms and the five feature selection algorithms.** (a) Heatmap of the AUCs yielded by the indicated deep learning model (row) using the indicated machine learning algorithm (column) and all five feature selection methods (i.e., each AUC is the average of 5 feature selection algorithm). (b) Heatmap of the AUCs yielded by the indicated deep learning model (row) using the indicated feature selection algorithm (column) and all five machine learning algorithms (i.e., each AUC is the average of 5 machine learning algorithm).

Supplementary Table S1: **Characteristics of the GTVp cohort**

|                                               | Characteristic: GTVp                  | Overall n = 96  |
|-----------------------------------------------|---------------------------------------|-----------------|
| Sex                                           | Male                                  | 81(84.4%)       |
|                                               | Female                                | 15(15.6%)       |
| Age (years: mean $\pm$ SD)                    |                                       | 67.1 $\pm$ 10.9 |
| Site                                          | nasopharynx                           | 13(13.5%)       |
|                                               | oropharynx                            | 31(32.3%)       |
|                                               | hypopharynx                           | 24(25.0%)       |
|                                               | oral cavity                           | 18(18.8%)       |
|                                               | larynx                                | 7(7.3%)         |
|                                               | paranasal sinus                       | 3(3.1%)         |
|                                               | –                                     | 65(67.7%)       |
| Oropharynx carcinoma HPV16                    | Positive                              | 10(10.4%)       |
|                                               | Negative                              | 21(21.9%)       |
| Treatment                                     | Radical radiotherapy                  | 80(83.3%)       |
|                                               | Postoperative recurrence radiotherapy | 16(16.7%)       |
| T stage                                       | T1                                    | 11(11.5%)       |
|                                               | T2                                    | 23(24.0%)       |
|                                               | T3                                    | 20(20.8%)       |
|                                               | T4                                    | 6(6.3%)         |
|                                               | T4a                                   | 13(13.5%)       |
|                                               | T4b                                   | 8(8.3%)         |
|                                               | –                                     | 15(15.6%)       |
|                                               | –                                     | 15(15.6%)       |
| N stage                                       | N0                                    | 12(12.5%)       |
|                                               | N1                                    | 22(22.9%)       |
|                                               | N2                                    | 11(11.5%)       |
|                                               | N2a                                   | 2(2.1%)         |
|                                               | N2b                                   | 15(15.6%)       |
|                                               | N2c                                   | 6(6.3%)         |
|                                               | N3                                    | 2(2.1%)         |
|                                               | N3b                                   | 11(11.5%)       |
|                                               | –                                     | 15(15.6%)       |
| M stage                                       | M0                                    | 94(97.9%)       |
|                                               | M1                                    | 2(2.1%)         |
| Chemotherapy                                  | Done                                  | 67(69.8%)       |
|                                               | No                                    | 29(30.2%)       |
| Multiple primary cancer                       | Yes                                   | 27(28.1%)       |
|                                               | No                                    | 69(71.9%)       |
| PEG (Percutaneous Endoscopic Gastrostomy)     | Yes                                   | 63(65.6%)       |
|                                               | No                                    | 33(34.4%)       |
| GTVp volume (cm <sup>3</sup> : mean $\pm$ SD) |                                       | 23.1 $\pm$ 22.3 |

Supplementary Table S2: **Characteristics of the GTVn cohort**

|                                               | Characteristic: GTVn                  | Overall n = 79  |           |
|-----------------------------------------------|---------------------------------------|-----------------|-----------|
| Sex                                           | Male                                  | 71(89.9%)       |           |
|                                               | Female                                | 8(10.1%)        |           |
| Age (years: mean $\pm$ SD)                    |                                       | 67.4 $\pm$ 9.98 |           |
| Site                                          | nasopharynx                           | 13(16.5%)       |           |
|                                               | oropharynx                            | 21(26.6%)       |           |
|                                               | hypopharynx                           | 22(27.8%)       |           |
|                                               | oral cavity                           | 15(19.0%)       |           |
|                                               | larynx                                | 8(10.1%)        |           |
|                                               | paranasal sinus                       | 0               |           |
|                                               | Oropharynx carcinoma HPV16            | Positive        | 17(21.5%) |
|                                               | Negative                              | 3(3.8%)         |           |
| Treatment                                     | -                                     | 59(74.7%)       |           |
|                                               | Radical radiotherapy                  | 65(82.3%)       |           |
|                                               | Postoperative recurrence radiotherapy | 14(17.7%)       |           |
| 13T stage                                     | T0                                    | 1(1.3%)         |           |
|                                               | T1                                    | 16(20.3%)       |           |
|                                               | T1b                                   | 2(2.5%)         |           |
|                                               | T2                                    | 16(20.3%)       |           |
|                                               | T3                                    | 14(17.7%)       |           |
|                                               | T4                                    | 4(5.1%)         |           |
|                                               | T4a                                   | 9(11.4%)        |           |
|                                               | T4b                                   | 3(3.8%)         |           |
|                                               | -                                     | 14(17.7%)       |           |
|                                               | N stage                               | N0              | 1(1.3%)   |
|                                               |                                       | N1              | 16(20.3%) |
| N2                                            |                                       | 7(8.9%)         |           |
| N2a                                           |                                       | 2(2.5%)         |           |
| N2b                                           |                                       | 14(17.7%)       |           |
| N2c                                           |                                       | 7(8.9%)         |           |
| N3                                            |                                       | 6(7.6%)         |           |
| N3b                                           |                                       | 12(15.2%)       |           |
| -                                             |                                       | 14(17.7%)       |           |
| M stage                                       |                                       | M0              | 77(97.5%) |
|                                               | M1                                    | 2(2.5%)         |           |
| Chemotherapy                                  | Done                                  | 61(77.2%)       |           |
|                                               | No                                    | 18(22.8%)       |           |
| Multiple primary cancer                       | Yes                                   | 17(21.5%)       |           |
|                                               | No                                    | 62(78.5%)       |           |
| PEG (Percutaneous Endoscopic Gastrostomy)     | Yes                                   | 55(69.6%)       |           |
|                                               | No                                    | 24(30.4%)       |           |
| GTVn volume (cm <sup>3</sup> : mean $\pm$ SD) |                                       | 33.3 $\pm$ 53.8 |           |

**Supplementary Table S3: Hyperparameters of the machine learning models.**

| Machine learning model             | Description                                                                                                                                                      |
|------------------------------------|------------------------------------------------------------------------------------------------------------------------------------------------------------------|
| Random Forest (RF)                 | The “fitcensemble” function was used in MATLAB. The weak learner used in the ensemble was the template tree. “NumLearningCycle” was set to 100.                  |
| Support Vector Machine (SVM)       | The “fitcsvm” function was used in MATLAB. The kernel function was the rbf kernel and the kernel scale was Auto.                                                 |
| K-Nearest Neighborhood (KNN)       | The “fitcknn” function was used in MATLAB. “NumNeighbors” was set to 10.                                                                                         |
| Naïve Bayes (NB)                   | The “fitcnb” function was used in MATLAB. “NumNeighbors” was set to 10. The normal (Gaussian) distribution was used for the data distribution to model the data. |
| Linear Discriminant Analysis (LDA) | The “fitcdiscr” function was used in MATLAB.                                                                                                                     |



**Supplementary Table S4: All handcrafted radiomics features used in this study (n = 107).**

| Category       | Feature Name                   |
|----------------|--------------------------------|
| Shape          | Voxel Volume                   |
| Shape          | Maximum 3D Diameter            |
| Shape          | Mesh Volume                    |
| Shape          | Major Axis Length              |
| Shape          | Sphericity                     |
| Shape          | Least Axis Length              |
| Shape          | Elongation                     |
| Shape          | Surface Volume Ratio           |
| Shape          | Maximum 2D Diameter Slice      |
| Shape          | Flatness                       |
| Shape          | Surface Area                   |
| Shape          | Minor Axis Length              |
| Shape          | Maximum 2D Diameter Column     |
| Shape          | Maximum 2D Diameter Row        |
| Intensity      | Interquartile Range            |
| Intensity      | Skewness                       |
| Intensity      | Uniformity                     |
| Intensity      | Median                         |
| Intensity      | Energy                         |
| Intensity      | Robust Mean Absolute Deviation |
| Intensity      | Mean Absolute Deviation        |
| Intensity      | Total Energy                   |
| Intensity      | Maximum                        |
| Intensity      | Root Mean Squared              |
| Intensity      | 90 <sup>th</sup> Percentile    |
| Intensity      | Minimum                        |
| Intensity      | Entropy                        |
| Intensity      | Range                          |
| Intensity      | Variance                       |
| Intensity      | 10 <sup>th</sup> Percentile    |
| Intensity      | Kurtosis                       |
| Intensity      | Mean                           |
| Texture (GLCM) | Joint Average                  |
| Texture (GLCM) | Sum Average                    |
| Texture (GLCM) | Joint Entropy                  |
| Texture (GLCM) | Cluster Shade                  |
| Texture (GLCM) | Maximum Probability            |

|                 |                                        |
|-----------------|----------------------------------------|
| Texture (GLCM)  | Inverse Difference Moment Normalized   |
| Texture (GLCM)  | Joint Energy                           |
| Texture (GLCM)  | Contrast                               |
| Texture (GLCM)  | Difference Entropy                     |
| Texture (GLCM)  | Inverse Variance                       |
| Texture (GLCM)  | Difference Variance                    |
| Texture (GLCM)  | Inverse Difference Normalized          |
| Texture (GLCM)  | Inverse Difference Moment              |
| Texture (GLCM)  | Correlation                            |
| Texture (GLCM)  | Autocorrelation                        |
| Texture (GLCM)  | Sum Entropy                            |
| Texture (GLCM)  | Maximal Correlation Coefficient        |
| Texture (GLCM)  | Sum Squares                            |
| Texture (GLCM)  | Cluster Prominence                     |
| Texture (GLCM)  | Informational Measure of Correlation 1 |
| Texture (GLCM)  | Informational Measure of Correlation 2 |
| Texture (GLCM)  | Difference Average                     |
| Texture (GLCM)  | Inverse Difference                     |
| Texture (GLCM)  | Cluster Tendency                       |
| Texture (GLRLM) | Short Run Low Gray Level Emphasis      |
| Texture (GLRLM) | Gray Level Variance                    |
| Texture (GLRLM) | Low Gray Level Run Emphasis            |
| Texture (GLRLM) | Gray Level Nonuniformity Normalized    |
| Texture (GLRLM) | Run Variance                           |
| Texture (GLRLM) | Gray Level Nonuniformity               |
| Texture (GLRLM) | Long Run Emphasis                      |
| Texture (GLRLM) | Short Run High Gray Level Emphasis     |
| Texture (GLRLM) | Run Length Nonuniformity               |
| Texture (GLRLM) | Short Run Emphasis                     |
| Texture (GLRLM) | Long Run High Gray Level Emphasis      |
| Texture (GLRLM) | Run Percentage                         |
| Texture (GLRLM) | Long Run Low Gray Level Emphasis       |
| Texture (GLRLM) | Run Entropy                            |
| Texture (GLRLM) | High Gray Level Run Emphasis           |
| Texture (GLRLM) | Run Length Nonuniformity Normalized    |
| Texture (GLSZM) | Gray Level Variance                    |
| Texture (GLSZM) | Zone Variance                          |
| Texture (GLSZM) | Gray Level Nonuniformity Normalized    |
| Texture (GLSZM) | Size Zone Nonuniformity Normalized     |

|                 |                                           |
|-----------------|-------------------------------------------|
| Texture (GLSZM) | Size Zone Nonuniformity                   |
| Texture (GLSZM) | Gray Level Nonuniformity                  |
| Texture (GLSZM) | Large Area Emphasis                       |
| Texture (GLSZM) | Small Area High Gray Level Emphasis       |
| Texture (GLSZM) | Zone Percentage                           |
| Texture (GLSZM) | Large Area Low Gray Level Emphasis        |
| Texture (GLSZM) | Large Area High Gray Level Emphasis       |
| Texture (GLSZM) | High Gray Level Zone Emphasis             |
| Texture (GLSZM) | Small Area Emphasis                       |
| Texture (GLSZM) | Low Gray Level Zone Emphasis              |
| Texture (GLSZM) | Zone Entropy                              |
| Texture (GLSZM) | Small Area Low Gray Level Emphasis        |
| Texture (GLDM)  | Gray Level Variance                       |
| Texture (GLDM)  | High Gray Level Emphasis                  |
| Texture (GLDM)  | Dependence Entropy                        |
| Texture (GLDM)  | Dependence Nonuniformity                  |
| Texture (GLDM)  | Gray Level Nonuniformity                  |
| Texture (GLDM)  | Small Dependence Emphasis                 |
| Texture (GLDM)  | Small Dependence High Gray Level Emphasis |
| Texture (GLDM)  | Dependence Nonuniformity Normalized       |
| Texture (GLDM)  | Large Dependence Emphasis                 |
| Texture (GLDM)  | Large Dependence Low Gray Level Emphasis  |
| Texture (GLDM)  | Dependence Variance                       |
| Texture (GLDM)  | Large Dependence High Gray Level Emphasis |
| Texture (GLDM)  | Small Dependence Low Gray Level Emphasis  |
| Texture (GLDM)  | Low Gray Level Emphasis                   |
| Texture (NGTDM) | Coarseness                                |
| Texture (NGTDM) | Complexity                                |
| Texture (NGTDM) | Strength                                  |
| Texture (NGTDM) | Contrast                                  |
| Texture (NGTDM) | Busyness                                  |

GLCM: Gray Level Co-occurrence Matrix; GLRLM: Gray Level Run Length Matrix; GLSZM: Gray Level Size Zone Matrix; GLDM: Gray Level Dependence Matrix; NGTDM: Neighboring Gray Tone Difference Matrix

Supplementary Table S5: **Correlation between selected deep features and the initial GTVp volume in all 16 deep learning models using five feature selection methods.**

|                   | CHSQ                     | WLCX                     | NCA                      | ReliefF                  | infFS                    |
|-------------------|--------------------------|--------------------------|--------------------------|--------------------------|--------------------------|
| SqueezeNet        | 0.06<br>(-F0.18 to 0.15) | -0.01<br>(-0.14 to 0.12) | -0.04<br>(-0.18 to 0.28) | 0.11<br>(0.02 to 0.15)   | 0.07<br>(-0.09 to 0.16)  |
| GoogleNet         | -0.02<br>(-0.2 to 0.15)  | 0.02<br>(-0.16 to 0.13)  | 0.07<br>(-0.08 to 0.15)  | 0.02<br>(-0.17 to 0.12)  | 0.05<br>(-0.12 to 0.20)  |
| Inceptionv3       | 0.00<br>(-0.22 to 0.13)  | -0.02<br>(-0.16 to 0.28) | -0.03<br>(-0.16 to 0.28) | 0.01<br>(-0.15 to 0.28)  | 0.00<br>(-0.22 to 0.19)  |
| DenseNet201       | 0.05<br>(-0.15 to 0.15)  | -0.02<br>(-0.14 to 0.28) | -0.03<br>(-0.22 to 0.15) | 0.00<br>(-0.22 to 0.28)  | 0.02<br>(-0.08 to 0.10)  |
| MobileNetv2       | 0.02<br>(-0.22 to 0.25)  | 0.03<br>(-0.24 to 0.22)  | -0.09<br>(-0.2 to 0.10)  | 0.02<br>(-0.2 to 0.14)   | -0.06<br>(-0.15 to 0.15) |
| ResNet18          | -0.03<br>(-0.11 to 0.21) | 0.00<br>(-0.17 to 0.22)  | 0.01<br>(-0.16 to 0.21)  | -0.01<br>(-0.17 to 0.10) | 0.02<br>(-0.21 to 0.20)  |
| ResNet50          | 0.02<br>(-0.26 to 0.16)  | -0.02<br>(-0.15 to 0.17) | -0.03<br>(-0.15 to 0.17) | 0.02<br>(-0.15 to 0.17)  | 0.02<br>(-0.18 to 0.18)  |
| ResNet101         | -0.01<br>(-0.19 to 0.06) | 0.00<br>(-0.13 to 0.12)  | -0.06<br>(-0.12 to 0.09) | 0.01<br>(-0.10 to 0.19)  | 0.02<br>(-0.18 to 0.26)  |
| Xception          | 0.09<br>(-0.18 to 0.16)  | -0.02<br>(-0.18 to 0.22) | 0.03<br>(-0.18 to 0.22)  | -0.04<br>(-0.18 to 0.17) | -0.06<br>(-0.12 to 0.17) |
| InceptionResNetv2 | 0.00<br>(-0.14 to 0.08)  | -0.04<br>(-0.09 to 0.14) | -0.04<br>(-0.09 to 0.15) | 0.03<br>(-0.08 to 0.13)  | 0.00<br>(-0.09 to 0.05)  |
| ShuffleNet        | -0.03<br>(-0.23 to 0.11) | 0.03<br>(-0.2 to 0.14)   | 0.00<br>(-0.14 to 0.15)  | -0.02<br>(-0.1 to 0.13)  | -0.01<br>(-0.27 to 0.05) |
| NASNetMobile      | -0.06<br>(-0.15 to 0.17) | 0.03<br>(-0.12 to 0.12)  | -0.04<br>(-0.1 to 0.17)  | -0.06<br>(-0.12 to 0.12) | -0.02<br>(-0.14 to 0.09) |
| NASNetLarge       | 0.01<br>(-0.1 to 0.22)   | -0.04<br>(-0.1 to 0.17)  | 0.03<br>(-0.09 to 0.17)  | -0.01<br>(-0.08 to 0.08) | 0.03<br>(-0.09 to 0.13)  |
| DarkNet19         | 0.01<br>(-0.12 to 0.09)  | -0.01<br>(-0.1 to 0.13)  | 0.01<br>(-0.16 to 0.20)  | -0.07<br>(-0.14 to 0.13) | -0.02<br>(-0.22 to 0.10) |
| DarkNet53         | -0.02<br>(-0.17 to 0.18) | -0.02<br>(-0.17 to 0.26) | 0.01<br>(-0.15 to 0.26)  | 0.02<br>(-0.17 to 0.24)  | -0.05<br>(-0.18 to 0.10) |
| AlexNet           | -0.07<br>(-0.14 to 0.15) | -0.04<br>(-0.08 to 0.09) | -0.03<br>(-0.20 to 0.27) | -0.09<br>(-0.26 to 0.08) | 0.01<br>(-0.15 to 0.18)  |

CHSQ: Chi square score; WLCX: Wilcoxon; NCA: Neighborhood Component Analysis; infFS: Infinite Feature Selection.

The median correlations of the 10 selected deep features are shown. The corresponding minimum and maximum values are given in parentheses below the median. All selected deep features had very weak correlations with the primary gross tumor volume (GTVp) volume.

**Supplementary Table S6: Correlations between selected deep features and the initial GTVn volume in all 16 deep learning models using five feature selection methods.**

|                   | CHSQ                     | WLCX                     | NCA                      | ReliefF                  | infFS                    |
|-------------------|--------------------------|--------------------------|--------------------------|--------------------------|--------------------------|
| SqueezeNet        | 0.00<br>(-0.14 to 0.11)  | 0.04<br>(-0.13 to 0.13)  | 0.01<br>(-0.18 to 0.18)  | 0.01<br>(-0.13 to 0.13)  | 0.09<br>(-0.17 to 0.22)  |
| GoogleNet         | -0.02<br>(-0.16 to 0.18) | 0.05<br>(-0.06 to 0.20)  | 0.02<br>(-0.16 to 0.14)  | 0.02<br>(-0.23 to 0.26)  | 0.04<br>(-0.15 to 0.16)  |
| Inceptionv3       | -0.05<br>(-0.21 to 0.09) | -0.05<br>(-0.09 to 0.20) | -0.03<br>(-0.13 to 0.09) | -0.05<br>(-0.14 to 0.05) | -0.02<br>(-0.10 to 0.12) |
| DenseNet201       | 0.00<br>(-0.09 to 0.15)  | -0.04<br>(-0.10 to 0.08) | -0.02<br>(-0.09 to 0.33) | 0.00<br>(-0.06 to 0.14)  | 0.08<br>(-0.05 to 0.16)  |
| MobileNetv2       | -0.06<br>(-0.16 to 0.19) | -0.01<br>(-0.18 to 0.17) | -0.03<br>(-0.17 to 0.17) | -0.02<br>(-0.17 to 0.12) | -0.08<br>(-0.17 to 0.17) |
| ResNet18          | 0.05<br>(-0.13 to 0.19)  | -0.03<br>(-0.18 to 0.07) | -0.03<br>(-0.17 to 0.10) | 0.03<br>(-0.17 to 0.19)  | 0.01<br>(-0.17 to 0.17)  |
| ResNet50          | -0.01<br>(-0.14 to 0.10) | -0.05<br>(-0.19 to 0.06) | 0.01<br>(-0.08 to 0.16)  | 0.00<br>(-0.14 to 0.09)  | -0.02<br>(-0.18 to 0.16) |
| ResNet101         | 0.00<br>(-0.13 to 0.12)  | -0.06<br>(-0.13 to 0.08) | 0.00<br>(-0.13 to 0.14)  | 0.01<br>(-0.09 to 0.14)  | 0.02<br>(-0.04 to 0.17)  |
| Xception          | 0.01<br>(-0.12 to 0.15)  | 0.00<br>(-0.12 to 0.15)  | -0.01<br>(-0.12 to 0.12) | -0.07<br>(-0.12 to 0.15) | 0.02<br>(-0.18 to 0.15)  |
| InceptionResNetv2 | -0.03<br>(-0.22 to 0.15) | -0.09<br>(-0.33 to 0.14) | -0.06<br>(-0.27 to 0.17) | -0.04<br>(-0.28 to 0.26) | 0.01<br>(-0.08 to 0.15)  |
| ShuffleNet        | -0.06<br>(-0.18 to 0.12) | 0.01<br>(-0.11 to 0.16)  | 0.01<br>(-0.11 to 0.16)  | 0.00<br>(-0.19 to 0.16)  | 0.03<br>(-0.17 to 0.22)  |
| NASNetMobile      | -0.01<br>(-0.28 to 0.09) | 0.02<br>(-0.28 to 0.15)  | -0.03<br>(-0.13 to 0.15) | 0.05<br>(-0.14 to 0.15)  | 0.01<br>(-0.09 to 0.15)  |
| NASNetLarge       | -0.04<br>(-0.16 to 0.09) | -0.01<br>(-0.14 to 0.06) | -0.02<br>(-0.14 to 0.08) | -0.04<br>(-0.14 to 0.09) | 0.02<br>(-0.09 to 0.12)  |
| DarkNet19         | 0.01<br>(-0.23 to 0.22)  | 0.00<br>(-0.15 to 0.27)  | 0.00<br>(-0.14 to 0.12)  | 0.03<br>(-0.24 to 0.27)  | -0.01<br>(-0.15 to 0.13) |
| DarkNet53         | -0.05<br>(-0.20 to 0.03) | 0.01<br>(-0.23 to 0.29)  | 0.09<br>(-0.30 to 0.25)  | -0.01<br>(-0.20 to 0.29) | 0.09<br>(-0.11 to 0.21)  |
| AlexNet           | 0.00<br>(-0.10 to 0.14)  | 0.03<br>(-0.20 to 0.17)  | 0.06<br>(-0.06 to 0.17)  | 0.01<br>(-0.09 to 0.17)  | 0.01<br>(-0.15 to 0.17)  |

CHSQ: Chi square score; WLCX: Wilcoxon; NCA: Neighborhood Component Analysis; infFS: Infinite Feature Selection.

The median correlations of 10 selected deep features are shown. The corresponding minimum and maximum values are given in parentheses below the median. All selected deep features had very weak correlations with the nodal gross tumor volume (GTVn) volume.

Supplementary Table S7: Significant differences in the performance (0.632+ bootstrap AUC of 1000 repetitions) between the InceptionResNetv2 and handcrafted radiomics features and clinical factors for GTVp regression prediction.

| Features                                             | Machine learning | Feature selection | p value |
|------------------------------------------------------|------------------|-------------------|---------|
| InceptionResNetv2 vs. Handcrafted radiomics features | RF               | CHSQ              | 0.021   |
|                                                      | RF               | WLCX              | 0.008   |
|                                                      | RF               | NCA               | 0.359   |
|                                                      | RF               | ReliefF           | 0.112   |
|                                                      | RF               | infFS             | 0.147   |
|                                                      | KNN              | CHSQ              | 0.183   |
|                                                      | KNN              | WLCX              | < 0.001 |
|                                                      | KNN              | NCA               | 0.141   |
|                                                      | KNN              | ReliefF           | 0.014   |
|                                                      | KNN              | infFS             | 0.003   |
|                                                      | SVM              | CHSQ              | 0.102   |
|                                                      | SVM              | WLCX              | 0.039   |
|                                                      | SVM              | NCA               | 0.085   |
|                                                      | SVM              | ReliefF           | 0.161   |
|                                                      | SVM              | infFS             | 0.057   |
|                                                      | NB               | CHSQ              | 0.195   |
|                                                      | NB               | WLCX              | < 0.001 |
|                                                      | NB               | NCA               | 0.118   |
|                                                      | NB               | ReliefF           | 0.046   |
|                                                      | NB               | infFS             | 0.018   |
| LDA                                                  | CHSQ             | 0.427             |         |
| LDA                                                  | WLCX             | 0.001             |         |
| LDA                                                  | NCA              | 0.186             |         |
| LDA                                                  | ReliefF          | 0.080             |         |
| LDA                                                  | infFS            | 0.235             |         |
| InceptionResNetv2 vs. Clinical factors               | RF               | CHSQ              | 0.063   |
|                                                      | RF               | WLCX              | 0.081   |
|                                                      | RF               | NCA               | 0.124   |
|                                                      | RF               | ReliefF           | 0.112   |
|                                                      | RF               | infFS             | 0.197   |
|                                                      | KNN              | CHSQ              | 0.187   |
|                                                      | KNN              | WLCX              | 0.014   |
|                                                      | KNN              | NCA               | 0.031   |
| KNN                                                  | ReliefF          | 0.008             |         |

|     |         |       |
|-----|---------|-------|
| KNN | infFS   | 0.244 |
| SVM | CHSQ    | 0.093 |
| SVM | WLCX    | 0.032 |
| SVM | NCA     | 0.009 |
| SVM | ReliefF | 0.073 |
| SVM | infFS   | 0.190 |
| NB  | CHSQ    | 0.194 |
| NB  | WLCX    | 0.037 |
| NB  | NCA     | 0.100 |
| NB  | ReliefF | 0.070 |
| NB  | infFS   | 0.218 |
| LDA | CHSQ    | 0.485 |
| LDA | WLCX    | 0.046 |
| LDA | NCA     | 0.077 |
| LDA | ReliefF | 0.047 |
| LDA | infFS   | 0.107 |

---

RF: Random Forest; KNN: K-Nearest Neighbor; SVM: Support Vector Machine; NB: Naïve Bayes; LDA: Linear Discriminant Analysis; CHSQ: Chi square score; WLCX: Wilcoxon; NCA: Neighborhood Component Analysis; infFS: Infinite Feature Selection

Supplementary Table S8: **Significant differences in the performance (0.632+ bootstrap AUC of 1000 repetitions) between the NASNetLarge, handcrafted radiomics features and clinical factors for GTVn regression prediction.**

| Features                                       | Machine learning | Feature selection | p value |
|------------------------------------------------|------------------|-------------------|---------|
| NASNetLarge vs. Handcrafted radiomics features | RF               | CHSQ              | 0.055   |
|                                                | RF               | WLCX              | 0.243   |
|                                                | RF               | NCA               | 0.130   |
|                                                | RF               | ReliefF           | 0.021   |
|                                                | RF               | infFS             | 0.272   |
|                                                | KNN              | CHSQ              | 0.006   |
|                                                | KNN              | WLCX              | 0.013   |
|                                                | KNN              | NCA               | 0.006   |
|                                                | KNN              | ReliefF           | 0.037   |
|                                                | KNN              | infFS             | 0.006   |
|                                                | SVM              | CHSQ              | 0.308   |
|                                                | SVM              | WLCX              | 0.480   |
|                                                | SVM              | NCA               | 0.120   |
|                                                | SVM              | ReliefF           | 0.029   |
|                                                | SVM              | infFS             | 0.321   |
|                                                | NB               | CHSQ              | 0.127   |
|                                                | NB               | WLCX              | 0.051   |
|                                                | NB               | NCA               | < 0.001 |
|                                                | NB               | ReliefF           | 0.010   |
|                                                | NB               | infFS             | 0.094   |
| NASNetLarge vs. Clinical factors               | LDA              | CHSQ              | 0.115   |
|                                                | LDA              | WLCX              | 0.103   |
|                                                | LDA              | NCA               | 0.002   |
|                                                | LDA              | ReliefF           | 0.320   |
|                                                | LDA              | infFS             | 0.068   |
|                                                | RF               | CHSQ              | 0.165   |
|                                                | RF               | WLCX              | 0.492   |
|                                                | RF               | NCA               | 0.491   |
|                                                | RF               | ReliefF           | 0.094   |
|                                                | RF               | infFS             | 0.359   |
|                                                | KNN              | CHSQ              | 0.243   |
|                                                | KNN              | WLCX              | 0.351   |
|                                                | KNN              | NCA               | 0.235   |
|                                                | KNN              | ReliefF           | 0.074   |
|                                                | KNN              | infFS             | 0.433   |



|     |         |       |
|-----|---------|-------|
| SVM | CHSQ    | 0.224 |
| SVM | WLCX    | 0.049 |
| SVM | NCA     | 0.448 |
| SVM | ReliefF | 0.075 |
| SVM | infFS   | 0.439 |
| NB  | CHSQ    | 0.271 |
| NB  | WLCX    | 0.238 |
| NB  | NCA     | 0.245 |
| NB  | ReliefF | 0.067 |
| NB  | infFS   | 0.457 |
| LDA | CHSQ    | 0.348 |
| LDA | WLCX    | 0.069 |
| LDA | NCA     | 0.121 |
| LDA | ReliefF | 0.380 |
| LDA | infFS   | 0.134 |

---

RF: Random Forest; KNN: K-Nearest Neighbor; SVM: Support Vector Machine; NB: Naïve Bayes; LDA: Linear Discriminant Analysis; CHSQ: Chi square score; WLCX: Wilcoxon; NCA: Neighborhood Component Analysis; infFS: Infinite Feature Selection

Supplementary Table S9: **Classification performance of the InceptionResNetv2 model (ReliefF + SVM) using different  $\Delta$ GTVp thresholds.**

| InceptionResNetv2 model (ReliefF + SVM)   | Measured   |                |      |             |             |
|-------------------------------------------|------------|----------------|------|-------------|-------------|
|                                           | Regression | Non-regression | AUC  | Sensitivity | Specificity |
| Median threshold<br>(0.46%/treatment day) | 48         | 48             | 0.82 | 0.77        | 0.70        |
| 0.8%/treatment day                        | 40         | 56             | 0.87 | 0.76        | 0.82        |
| 1.2%/treatment day                        | 33         | 63             | 0.84 | 0.73        | 0.79        |
| 1.6%/treatment day                        | 31         | 65             | 0.82 | 0.74        | 0.75        |
| 2.0%/treatment day                        | 25         | 71             | 0.84 | 0.76        | 0.77        |
| 2.4%/treatment day                        | 20         | 76             | 0.83 | 0.77        | 0.76        |
| 2.8%/treatment day                        | 19         | 77             | 0.84 | 0.77        | 0.77        |
| 3.2%/treatment day                        | 17         | 79             | 0.83 | 0.79        | 0.75        |

SVM: Support Vector Machine

Classification of primary gross tumor volume (GTVp) regression and non-regression using 3.2%/treatment day as the threshold yielded area under the curve (AUC), sensitivity, and specificity values of 0.83, 0.79, and 0.75, respectively. Classification using the median (0.46%/treatment day) as the threshold yielded AUC, sensitivity, and specificity values of 0.82, 0.77, and 0.70, respectively. There was no significant change in the AUC when the threshold was increased. The highest sensitivity was observed using 3.2%/treatment day as the threshold.

Supplementary Table S10: **Classification performance of the NSANetLarge model (ReliefF + SVM)**

**using different  $\Delta$ GTVn thresholds.**

| NASNetLarge model (ReliefF + SVM)      | Measured   |               |      |             |             |
|----------------------------------------|------------|---------------|------|-------------|-------------|
|                                        | Regression | Nonregression | AUC  | Sensitivity | Specificity |
| Median threshold (1.40%/treatment day) | 40         | 39            | 0.84 | 0.65        | 0.83        |
| 1.7%/treatment day                     | 38         | 41            | 0.85 | 0.73        | 0.79        |
| 2.1%/treatment day                     | 33         | 46            | 0.84 | 0.73        | 0.77        |
| 2.5%/treatment day                     | 32         | 47            | 0.83 | 0.71        | 0.77        |
| 2.9%/treatment day                     | 27         | 52            | 0.80 | 0.71        | 0.73        |
| 3.3%/treatment day                     | 24         | 55            | 0.80 | 0.70        | 0.74        |
| 3.7%/treatment day                     | 19         | 60            | 0.82 | 0.73        | 0.77        |
| 4.1%/treatment day                     | 15         | 64            | 0.83 | 0.74        | 0.78        |

**SVM: Support Vector Machine**

Classification of nodal gross tumor volume (GTVn) regression and non-regression using 4.1%/treatment day as the threshold yielded area under the curve (AUC), sensitivity, and specificity values of 0.83, 0.74, and 0.78, respectively. Classification using the median (1.4%/treatment day) as the threshold yielded AUC, sensitivity, and specificity values of 0.84, 0.65, and 0.83, respectively. There was no significant change in the AUC when the threshold was increased. The highest sensitivity was observed using 4.1%/treatment day as the threshold.

## References

- 1 Clark, K. *et al.* The Cancer Imaging Archive (TCIA): maintaining and operating a public information repository. *Journal of digital imaging* **26**, 1045-1057 (2013).
